# Supplementary material
Source: publisher site journal article supplement (https://www.spandidos-publications.com/7049/downloadSupplementary)
Supplement: Supplementary file 1 [file downloadSupplementary]

## Sheet: GO_BP in Fig. 4D
Table SI. GO biological process terms enriched in PAX-interacting protein 1-associated genes in the hepatocellular carcinoma cohort.
Gene Set	Description	Size	Leading Edge Number	ES	NES	P Value	FDR
GO:0008213	protein alkylation	142	52	0.68837	1.731	<2.2x10-16	<2.2x10-16
GO:0017004	cytochrome complex assembly	19	7	-0.85845	-2.1035	<2.2x10-16	<2.2x10-16
GO:0009123	nucleoside monophosphate metabolic process	271	68	-0.56718	-2.1239	<2.2x10-16	<2.2x10-16
GO:0072376	protein activation cascade	87	58	-0.67856	-2.1909	<2.2x10-16	<2.2x10-16
GO:0070972	protein localization to endoplasmic reticulum	136	79	-0.67267	-2.3272	<2.2x10-16	<2.2x10-16
GO:0009141	nucleoside triphosphate metabolic process	254	69	-0.61935	-2.3642	<2.2x10-16	<2.2x10-16
GO:0140053	mitochondrial gene expression	142	66	-0.7355	-2.5683	<2.2x10-16	<2.2x10-16
GO:0006414	translational elongation	123	65	-0.76787	-2.6573	<2.2x10-16	<2.2x10-16
GO:0010257	NADH dehydrogenase complex assembly	49	41	-0.90631	-2.7578	<2.2x10-16	<2.2x10-16
GO:0033108	mitochondrial respiratory chain complex assembly	68	47	-0.879	-2.7658	<2.2x10-16	<2.2x10-16
GO:0051187	cofactor catabolic process	62	24	-0.65024	-2.0069	<2.2x10-16	0.00041377
GO:0016569	covalent chromatin modification	423	177	0.66251	1.7205	<2.2x10-16	0.00085386
GO:0000726	non-recombinational repair	67	30	0.7135	1.7144	<2.2x10-16	0.0011385
GO:0051321	meiotic cell cycle	217	69	0.65779	1.6919	<2.2x10-16	0.0028462
GO:0007051	spindle organization	152	57	0.66236	1.6761	<2.2x10-16	0.0029031
GO:0018205	peptidyl-lysine modification	312	95	0.654	1.6992	<2.2x10-16	0.0030739
GO:0018210	peptidyl-threonine modification	106	48	0.68001	1.6838	<2.2x10-16	0.003202
GO:0006260	DNA replication	233	101	0.65749	1.6767	<2.2x10-16	0.0032257
GO:0006302	double-strand break repair	180	83	0.66227	1.6856	<2.2x10-16	0.0036594
GO:0098727	maintenance of cell number	143	51	0.66645	1.7008	<2.2x10-16	0.0038424
ES, enrichment score; FDR, false discovery rate; GO, Gene Ontology; NES, normalized enrichment score.
